# Supplementary material
Source: MDPI journal article supplement (https://www.mdpi.com/2313-0105/8/8/100)
Supplement: s1 [file s1]

Supplementary Information

# Nickel-Doped Ceria Bifunctional Electrocatalysts for Oxygen Reduction and Evolution in Alkaline Media

Jadranka Milikić <sup>1</sup>, Rodolfo O. Fuentes <sup>2</sup>, Julia E. Tasca <sup>3</sup>, Diogo M. F. Santos <sup>4,\*</sup>, Biljana Šljukić <sup>1,4</sup> and Filipe M. L. Figueiredo <sup>5,\*</sup>

<sup>1</sup> University of Belgrade, Faculty of Physical Chemistry, Studentski trg 12–16, 11158 Belgrade, Serbia; jadranka@ffh.bg.ac.rs (J.M.); biljka@ffh.bg.ac.rs (B.Š.)

<sup>2</sup> Instituto de Nanociencia y Nanotecnología, Departamento de Física, Centro Atómico Constituyentes, CNEA-CONICET, Av. Gral. Paz 1499, San Martín, Buenos Aires B1650, Argentina; rofuentes@conicet.gov.ar

<sup>3</sup> CIFICEN (UNCPBA-CICPBA-CONICET), Facultad de Ingeniería–UNCPBA, Av. Del Valle 5737, Olavarría B74001WI, Argentina; jtasca@fio.unicen.edu.ar

<sup>4</sup> Center of Physics and Engineering of Advanced Materials (CeFEMA), Laboratory for Physics of Materials and Emerging Technologies (LaPMET), Chemical Engineering Department, Instituto Superior Técnico, Universidade de Lisboa, 1049–001 Lisbon, Portugal

<sup>5</sup> CICECO, Physics Dept., University of Aveiro, Campus Universitário de Santiago, 3810-193 Aveiro, Portugal

\* Correspondence: diogosantos@tecnico.ulisboa.pt (D.M.F.S.); lebre@ua.pt (F.M.L.F.)

**Citation:** Milikić, J.; Fuentes, R.O.; Tasca, J.E.; Santos, D.M.F.; Šljukić, B.; Figueiredo, F.M.L. Nickel-Doped Ceria Bifunctional Electrocatalysts for Oxygen Reduction and Evolution in Alkaline Media. *Batteries* **2022**, *8*, 100. <https://doi.org/10.3390/batteries8080100>

Academic Editor: Seung-Tae Hong

Received: 24 July 2022

Accepted: 17 August 2022

Published: 19 August 2022

**Publisher's Note:** MDPI stays neutral with regard to jurisdictional claims in published maps and institutional affiliations.

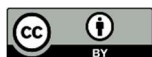

**Copyright:** © 2022 by the authors. Submitted for possible open access publication under the terms and conditions of the Creative Commons Attribution (CC BY) license (<https://creativecommons.org/licenses/by/4.0/>).

## Supplementary Information

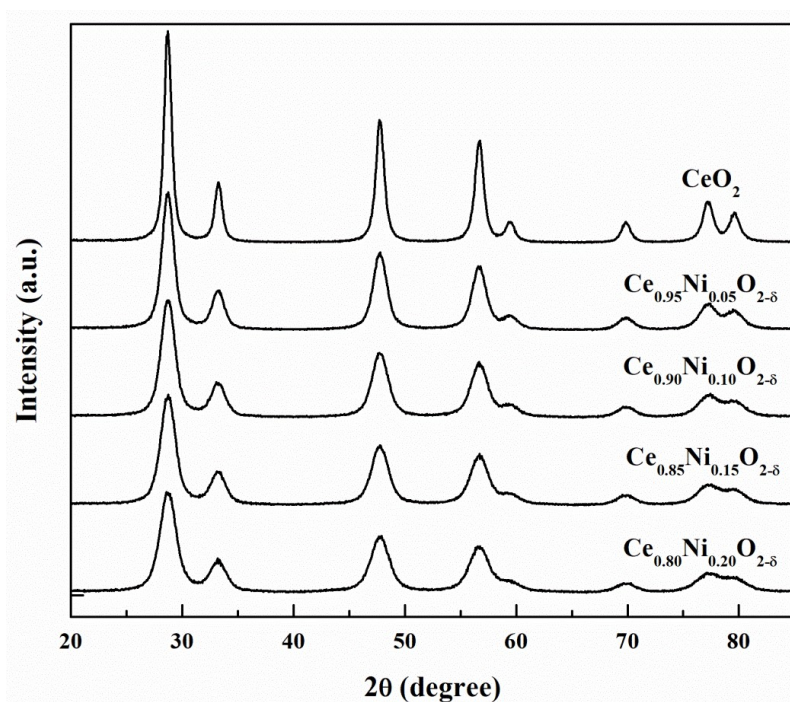

**Figure S1.** Synchrotron radiation powder X-ray diffraction (SR-XRD) patterns recorded at room temperature for the nanostructured  $\text{Ce}_{1-x}\text{Ni}_x\text{O}_{2-\delta}$  materials.

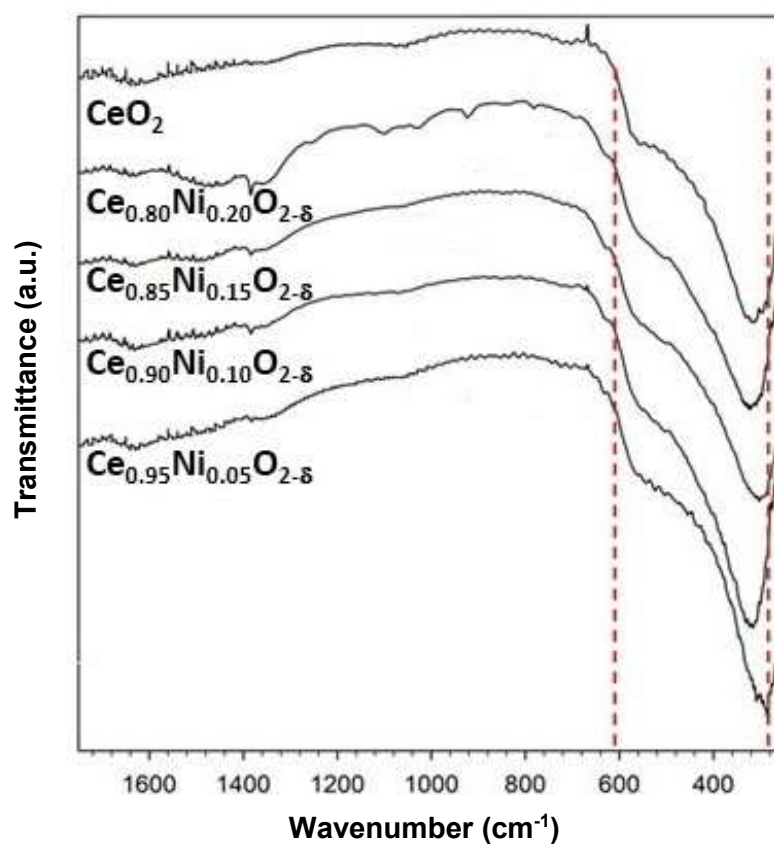

**Figure S2.** Fourier transform infrared spectra (FTIR) spectra of the  $\text{Ce}_{1-x}\text{Ni}_x\text{O}_{2-\delta}$  nanopowders.

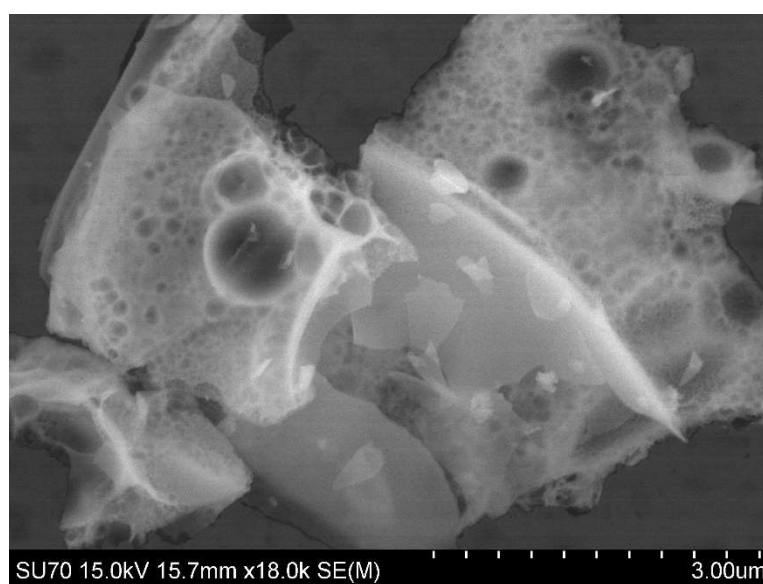

**Figure S3.** Low-resolution scanning transmission electron microscopy (STEM) image of the  $\text{Ce}_{0.90}\text{Ni}_{0.10}\text{O}_{2-\delta}$  sample obtained on a Scanning Electron Microscope equipped with a transmission detector (Hitachi SU 70).

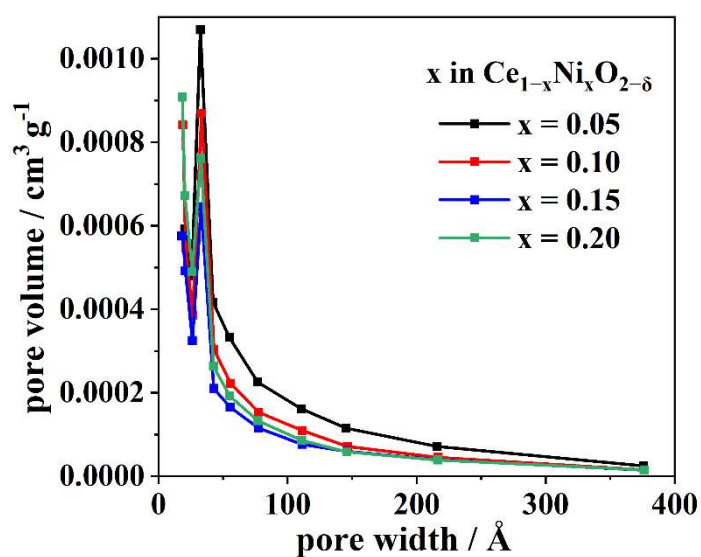

**Figure S4.** Pore size distribution for the  $\text{Ce}_{1-x}\text{Ni}_x\text{O}_{2-\delta}$  nanopowders estimated from the nitrogen desorption data using the Barrett-Joyner-Halenda method utilizing the Halsey thickness curve with the G.S. Faass correction.

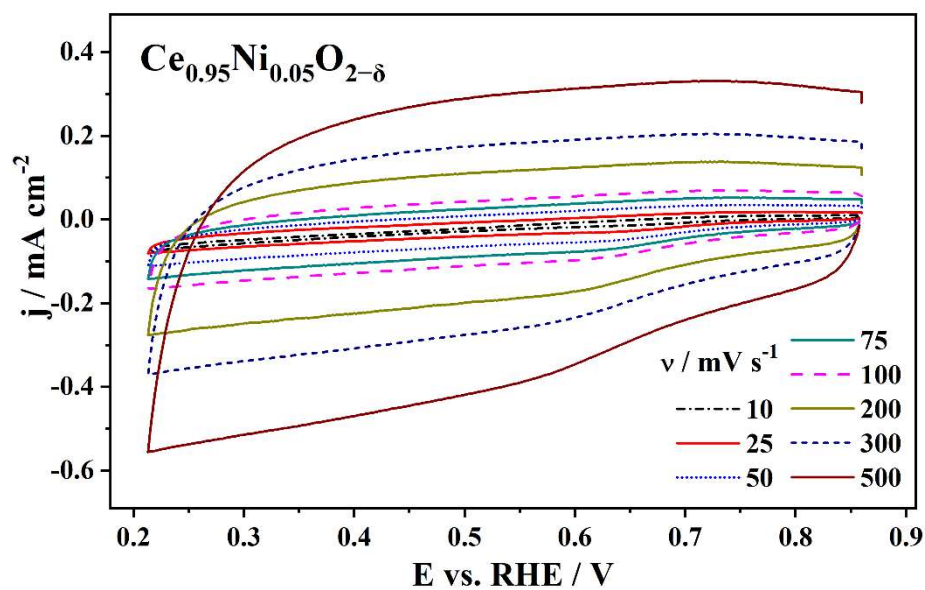

**Figure S5.** Cyclic voltammograms of  $\text{Ce}_{0.95}\text{Ni}_{0.05}\text{O}_{2-\delta}$  in deaerated 0.1 M KOH electrolyte solution at scan rates ranging from 10 to 500  $\text{mV s}^{-1}$ .

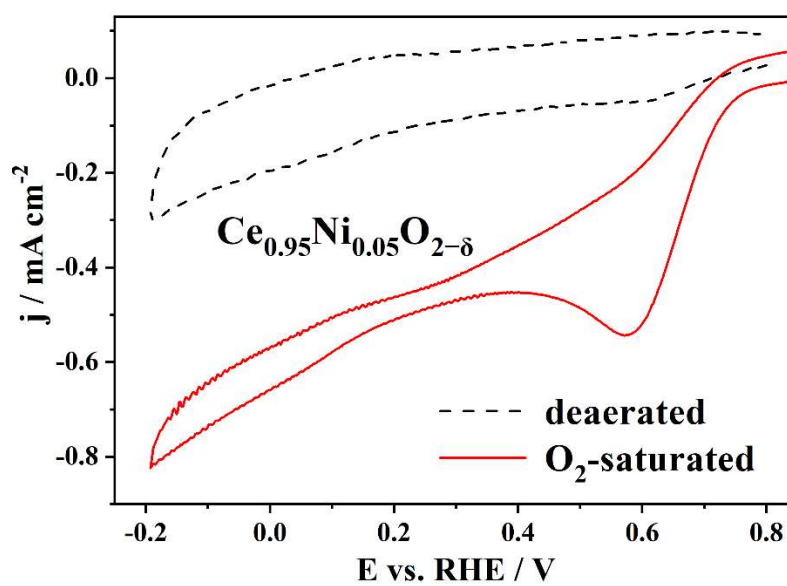

**Figure S6.** Voltammetric response of  $\text{Ce}_{0.95}\text{Ni}_{0.05}\text{O}_{2-\delta}$  in deaerated and  $\text{O}_2$ -saturated 0.1 M KOH.
